# Supplementary material for: A Novel Equation for Cooperativity of the Allosteric State Function
Source: PubMed Central journal article supplement (PMC3898861; doi:10.1016/j.jmb.2013.09.010), 2014-01-09
Supplement: mmc1.pdf [file mmc1.pdf]

## Supplementary Material

BREVIA

### A novel equation for cooperativity of the allosteric state function

*Stuart Edelstein*

Babraham Institute, Cambridge CB22 3AT, UK.

**Derivation of the equation for the Hill coefficient of the state function.** By analogy with  $\bar{Y}$ , the Hill coefficient for  $\bar{R}$ , here represented by  $n'_H$ , can be defined as:

$$n'_H = \frac{d \log \left( \frac{\bar{R}}{1 - \bar{R}} \right)}{d \log \alpha} = \frac{\alpha}{\bar{R} (1 - \bar{R})} \left( \frac{d \bar{R}}{d \alpha} \right) \quad (S1)$$

where  $\bar{R}$  is defined by the Monod-Wyman-Changeux equation for an oligomer with n subunits:<sup>1</sup>

$$\bar{R} = \frac{(1 + \alpha)^n}{(1 + \alpha)^n + L(1 + c\alpha)^n} \quad (S2)$$

In order to replace the terms in the denominator on the right side of equation (S1), the term  $1 - \bar{R}$  is recast as:

$$1 - \bar{R} = \frac{(1 + \alpha)^n + L(1 + c\alpha)^n - (1 + \alpha)^n}{(1 + \alpha)^n + L(1 + c\alpha)^n} = \frac{L(1 + c\alpha)^n}{(1 + \alpha)^n + L(1 + c\alpha)^n} \quad (S3)$$

Combining terms in equations (S2) and (S3) for  $\bar{R} (1 - \bar{R})$  gives:

$$\bar{R} (1 - \bar{R}) = \frac{(1 + \alpha)^n L(1 + c\alpha)^n}{[(1 + \alpha)^n + L(1 + c\alpha)^n]^2} \quad (S4)$$

For the term  $\frac{d \bar{R}}{d \alpha}$ , use is made of the equation previously reported:<sup>2</sup>

$$\frac{d \bar{R}}{d \alpha} = \frac{nL \left( \frac{1+c\alpha}{1+\alpha} \right)^{n-1} (1-c)}{\left[ 1 + L \left( \frac{1+c\alpha}{1+\alpha} \right)^n \right]^2 (1+\alpha)^2} \quad (S5)$$

Incorporating the terms in equations (S4) and (S5) into equation (S1) yields the following equation for  $n'_H$ :

$$n'_H = \frac{\alpha [(1 + \alpha)^n + L(1 + c\alpha)^n]^2}{(1 + \alpha)^n L(1 + c\alpha)^n} \frac{nL \left( \frac{1+c\alpha}{1+\alpha} \right)^{n-1} (1-c)}{\left[ 1 + L \left( \frac{1+c\alpha}{1+\alpha} \right)^n \right]^2 (1+\alpha)^2} \quad (S6)$$

Equation (S6) can be rearranged to a form that facilitates cancellation of terms:

$$n'_H = \frac{n(1-c)L(1+c\alpha)^{n-1}}{L(1+c\alpha)^n} \frac{\alpha[(1+\alpha)^n + L(1+c\alpha)^n]^2}{[(1+\alpha)^n + L(1+c\alpha)^n]^2} \frac{(1+\alpha)^n (1+\alpha)^n}{(1+\alpha)^{n-1}(1+\alpha)^2(1+\alpha)^n} \quad (S7)$$

Upon cancellation of identical terms in the numerator and the denominator, the simple equation (4) in the main text for the Hill coefficient of  $\bar{R}$  is obtained:

$$n'_H = \frac{n(1-c)}{(1+c\alpha)} \frac{\alpha}{(1+\alpha)} \quad (S8)$$

Reference:

1. Monod, J., Wyman, J. & Changeux, J.-P. (1965). On the nature of allosteric transitions: A plausible model. *J. Mol. Biol.* **12**, 88-118.
2. Edelstein, S. J., Stefan, M. I. & Le Novere, N. (2010). Ligand depletion in vivo modulates the dynamic range and cooperativity of signal transduction. *PLoS One* **5**, e8449.
